# Supplementary material
Source: PubMed Central journal article supplement (PMC9722639)
Supplement: NIHMS1840530-supplement-1.pdf [file NIHMS1840530-supplement-1.pdf]

| Patient Number | Treatment Cohort | Radiation Regimen                     | Chemotherapy Prior to RT             | Chemotherapy Concurrent with RT |
|----------------|------------------|---------------------------------------|--------------------------------------|---------------------------------|
| 1              | Chemo/RT         | 5400 cGy, unclear fractionation       | 5-FU                                 | 5-FU                            |
| 2              | Chemo/RT         | 5500 cGy, 220 cGy daily, 25 fractions | FOLFIRINOX                           | Gemcitabine                     |
| 3              | Chemo/RT         | 5500 cGy, 220 cGy daily, 25 fractions | FOLFIRINOX                           | Gemcitabine                     |
| 4              | Chemo/RT         | 4860 cGy, unclear fractionation       | Gemcitabine                          | Gemcitabine                     |
| 5              | Chemo/RT         | 5500 cGy, 220 cGy daily, 25 fractions | FOLFIRINOX                           | Gemcitabine                     |
| 6              | Chemo/RT         | 5500 cGy, 220 cGy daily, 25 fractions | FOLFIRINOX                           | Gemcitabine                     |
| 7              | Chemo/RT         | 5500 cGy, 220 cGy daily, 25 fractions | FOLFIRINOX                           | Gemcitabine                     |
| 8              | Chemo/RT         | 5500 cGy, 220 cGy daily, 25 fractions | Gemcitabine + Oxaliplatin            | Capecitabine                    |
| 9              | Chemo/RT         | 5500 cGy, 220 cGy daily, 25 fractions | Gemcitabine                          | Gemcitabine                     |
| 10             | Chemo/RT         | 5500 cGy, 220 cGy daily, 25 fractions | FOLFIRINOX                           | Gemcitabine                     |
| 11             | Chemo/RT         | 3240 cGy, 180 cGy daily, 18 fractions | Gemcitabine/Abraxane                 | Gemcitabine/Abraxane            |
| 12             | Chemo/RT         | 5745 cGy, 383 cGy daily, 15 fractions | Gemcitabine/Abraxane                 | Gemcitabine/Abraxane            |
| 13             | Chemo/RT         | 5500 cGy, 220 cGy daily, 25 fractions | FOLFIRINOX → Capecitabine            | Capecitabine                    |
| 14             | Chemo/RT         | 5040 cGy, 180 cGy daily, 28 fractions | Gemcitabine                          | Gemcitabine                     |
| 15             | Chemo/SBRT       | 6750 cGy, 450 cGy daily, 15 fractions | FOLFIRINOX                           | Capecitabine                    |
| 16             | Chemo/SBRT       | 6750 cGy, 450 cGy daily, 15 fractions | Gemcitabine/Abraxane                 | Gemcitabine/Abraxane            |
| 17             | Chemo/SBRT       | 6750 cGy, 450 cGy daily, 15 fractions | FOLFIRINOX → Gemcitabine/Abraxane    | Capecitabine                    |
| 18             | Chemo/SBRT       | 6750 cGy, 450 cGy daily, 15 fractions | Gemcitabine/Abraxane                 | Gemcitabine/Abraxane            |
| 19             | Chemo/SBRT       | 6750 cGy, 450 cGy daily, 15 fractions | Gemcitabine/Abraxane                 | Gemcitabine/Abraxane            |
| 20             | Chemo/SBRT       | 6750 cGy, 450 cGy daily, 15 fractions | Gemcitabine/Abraxane                 | Gemcitabine/Abraxane            |
| 21             | Chemo/SBRT       | 6750 cGy, 450 cGy daily, 15 fractions | Cisplatin + Gemcitabine → FOLFIRINOX | Capecitabine                    |
| 22             | Chemo/SBRT       | 6750 cGy, 450 cGy daily, 15 fractions | Gemcitabine/Abraxane                 | Capecitabine                    |

**Supplementary Table S1: Treatment History of PDAC Patients in Figure 1**

Detailed RT dose and fractionation regimen and chemotherapy treatment prior to RT and concurrent with RT for patients used in **Figure 1**.
