# Supplementary material
Source: PubMed Central journal article supplement (PMC9722639)
Supplement: NIHMS1840530-supplement-4.pdf [file NIHMS1840530-supplement-4.pdf]

A KPOG organoid in vitro

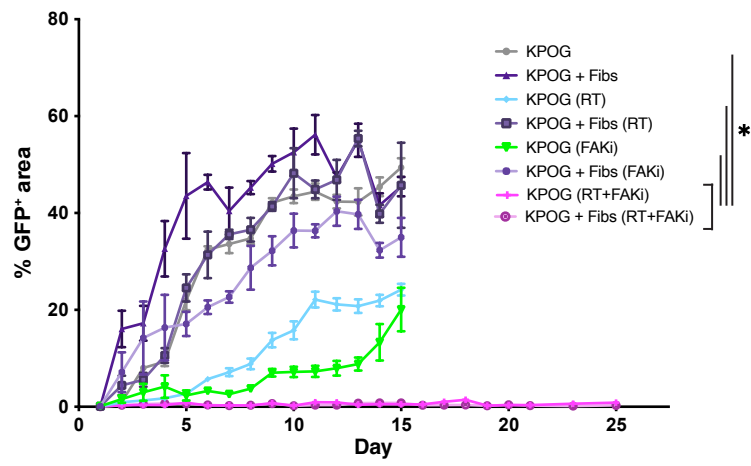

B

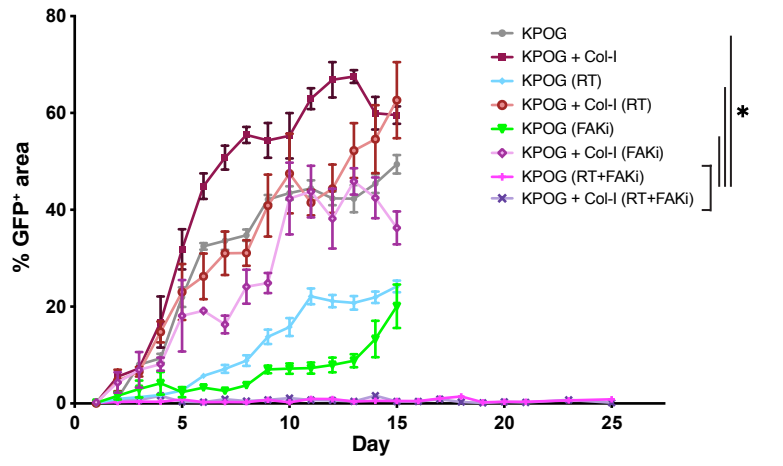

C

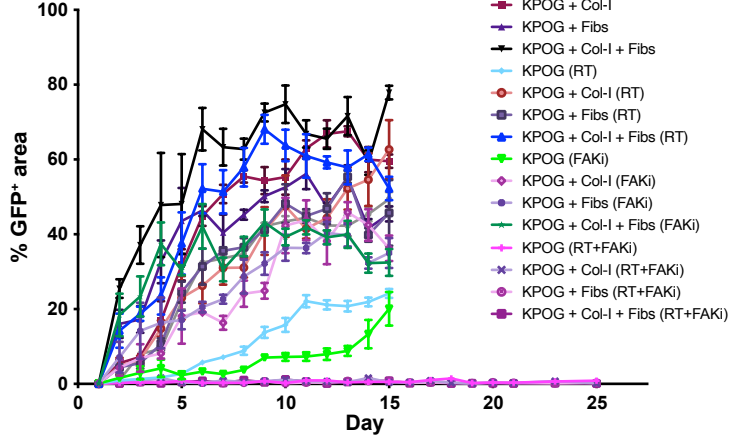

D

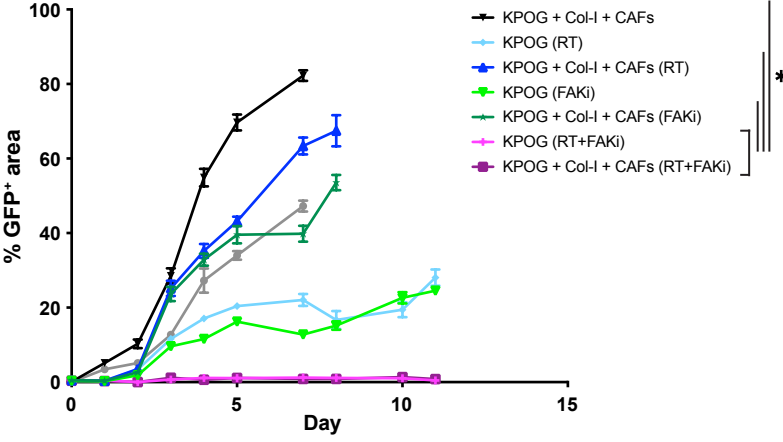

E Proteomics (KRAS-INK)

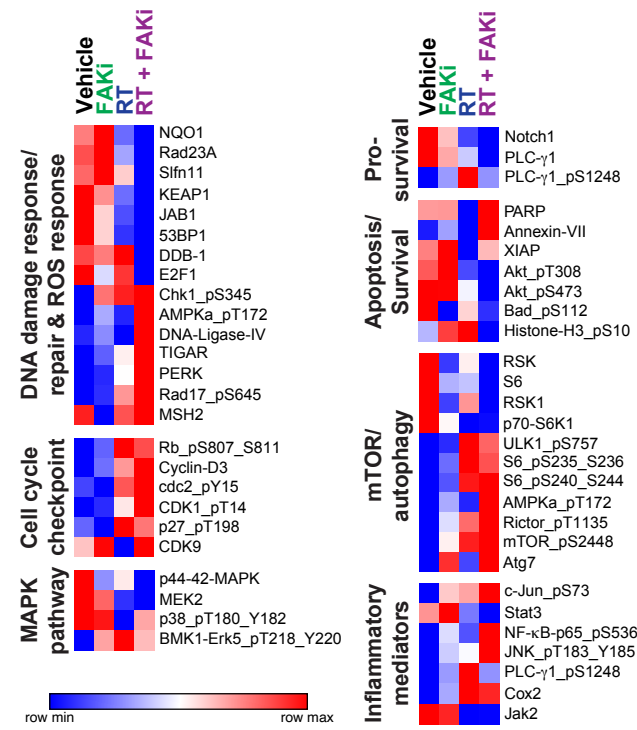

F

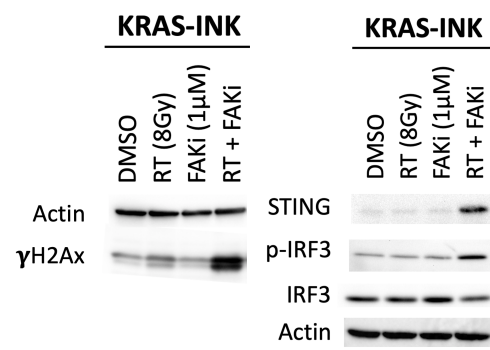

G

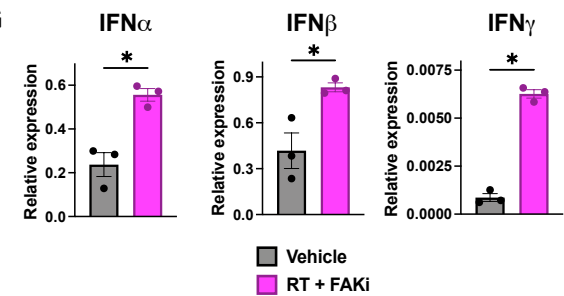

### **Figure S3: Inhibition of Focal Adhesion Kinase overcomes stromal-induced RT resistance**

**(A-C)** Tumor growth analyses of select groups of KPOG organoids co-cultured with fibroblasts (A), KPOG organoids co-cultured with addition of collagen-I (B), and all groups shown (C) when treated with RT +/- FAKi. Cells were cultured as in **Fig. 2A**. n = at least 3/group. **(D)** Tumor growth analysis of KPOG organoids co-cultured with FACS-sorted CAFs from KPC mice and collagen-I treated with RT +/- FAKi. n = at least 4/group. **(E)** RPPA analysis heatmap displaying expression level of proteins related to: (i) DNA damage response/repair and ROS response, (ii) cell cycle checkpoint, (iii) MAPK pathway, (iv) pro-survival, (v) apoptosis/survival, (vi) mTOR/autophagy, and (vii) inflammatory mediators. Proteins were taken from KRAS-INK cells at 24 hours post-treatment. n = at least 3/group. **(F)** Western Blot analysis of  $\gamma$ H2Ax, STING, p-IRF3, and total IRF3 proteins from KRAS-INK cells 24 hours post-RT. n = at least 3/group. Representative of at least 3 individual experiments. **(G)** RT-PCR analysis of genes encoding IFN $\alpha$ , IFN $\beta$ , and IFN $\gamma$  proteins from KRAS-INK cells 24 hours post-RT. n = at least 3/group.

All graphs depict mean +/- SEM. “\*” denotes  $p < 0.05$  by two-tailed t-test or one-way ANOVA as appropriate.
