# Supplementary material
Source: PubMed Central journal article supplement (PMC9722639)
Supplement: NIHMS1840530-supplement-5.pdf [file NIHMS1840530-supplement-5.pdf]

**A KPC GEMM**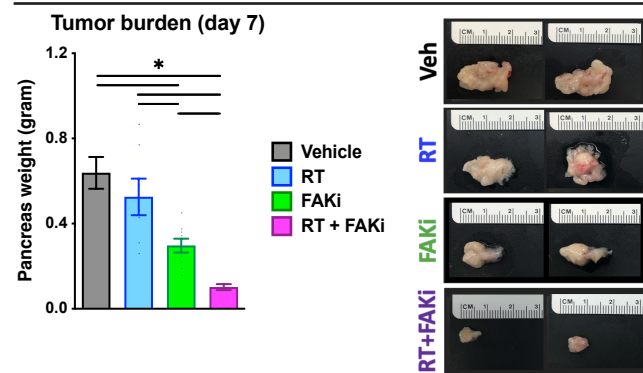**B KPC-OG GEMM**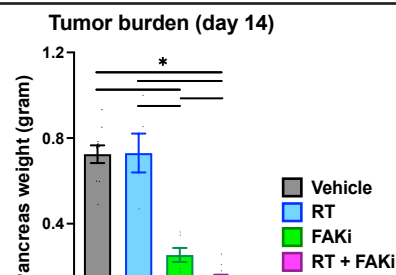**C PDA.69 (KRAS p53<sup>R172H</sup>) Fig S4**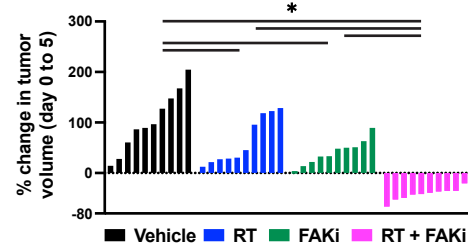**D KRAS-INK**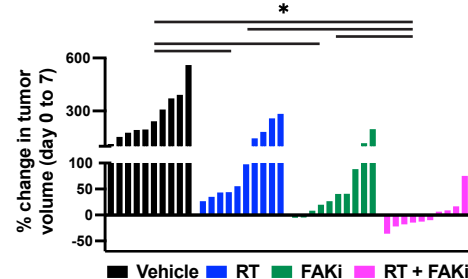**E KPC GEMM**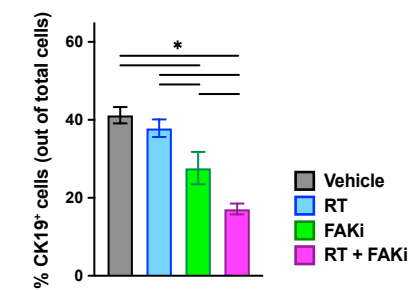**F KPC GEMM (Day 14)**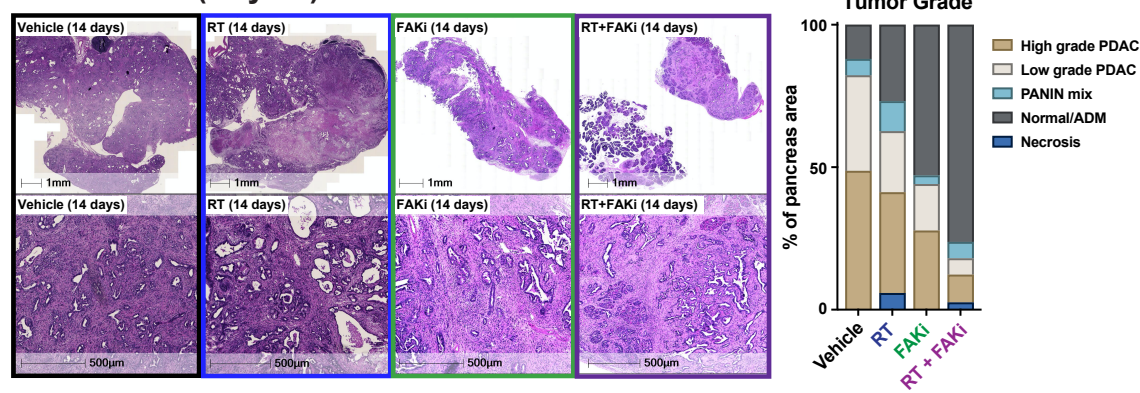**G****Tumor**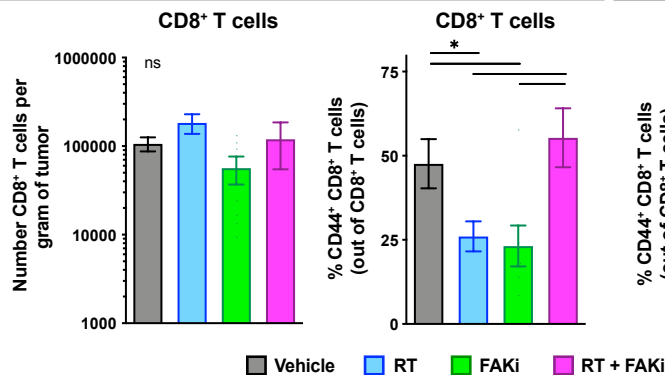**Lymph Node**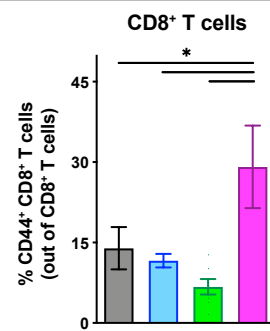**I KP2 syngeneic**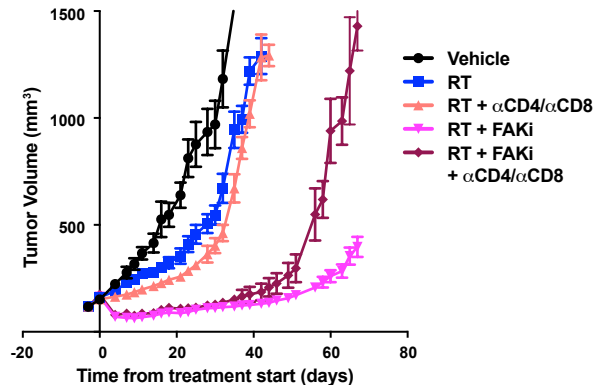**H CD4<sup>+</sup> Foxp3<sup>+</sup> T cells**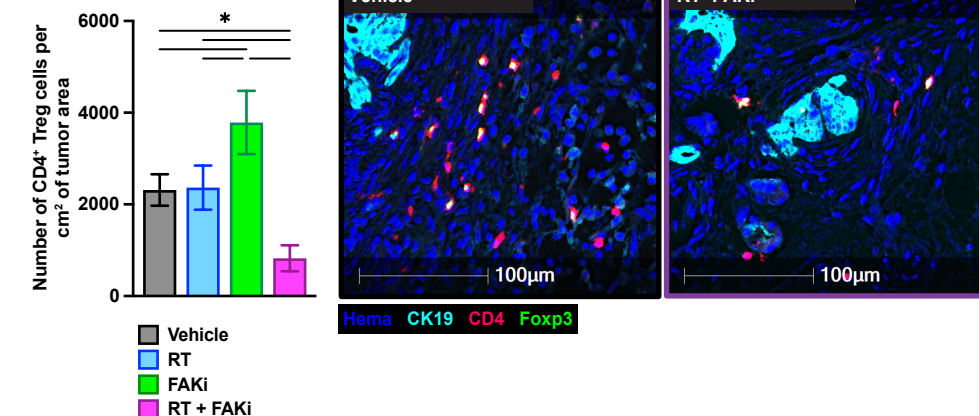**J KP2 OVA GFP**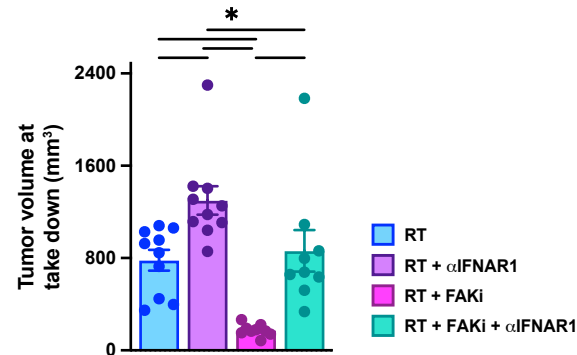

**Figure S4: Combining FAKi with RT leads to immune priming *in-vivo***

**(A)** Day 7 pancreas weight of KPC mice from **Fig. 4A**. Representative gross tissue images are depicted. n = at least 7 mice/group. **(B)** Day 14 pancreas weight of KPC-OG mice from **Fig. 4I** treated as depicted in **Fig. 4A**. n = at least 7 mice/group. **(C)** Waterfall plot of PDA.69 (KRAS<sup>G12D</sup>/p53<sup>R172H/+</sup>) syngeneic tumor-bearing mice treated as depicted in **Fig. 4A** evaluating tumor growth difference from day 0 to 5. n = 10 mice/group. **(D)** Waterfall plot of KRAS-INK orthotopic tumor-bearing mice treated as depicted in **Fig. 4A** evaluating tumor growth difference from day 0 to 7. n = 5-10 mice/group. **(E)** IHC analysis of CK19<sup>+</sup> tumor cells in KPC mice at day 14. n = at least 7 mice/group. **(F)** Tumor grade and representative H&E images of KPC mice at day 14. n = at least 7 mice/group. **(G)** Flow cytometry quantification of total CD8<sup>+</sup> T cells and percentage of CD44<sup>+</sup> CD8<sup>+</sup> T cells out of total CD8<sup>+</sup> T cells in KPC mice at day 14. n = at least 7 mice/group. **(H)** mIHC analysis of CD4<sup>+</sup> Foxp3<sup>+</sup> T regulatory cells in tissues from KPC mice at day 14. Representative CK19, CD4, and Foxp3 fused mIHC images are depicted. n = at least 5 mice/group. **(I)** Tumor growth kinetics of KP2 syngeneic tumor-bearing mice from **Fig. 4L-M**. n = 10 mice/group. **(J)** Day 40 tumor weight of KP2-OVA-GFP tumor bearing mice treated with RT ± FAKi ± αIFNAR1 blocking antibody. n = 10 mice/group.

All graphs depict mean +/- SEM. “\*” denotes p < 0.05 by two-tailed t-test or one-way ANOVA as appropriate. “ns” denotes not significant.
