# Supplementary material
Source: PubMed Central journal article supplement (PMC9722639)
Supplement: NIHMS1840530-supplement-6.pdf [file NIHMS1840530-supplement-6.pdf]

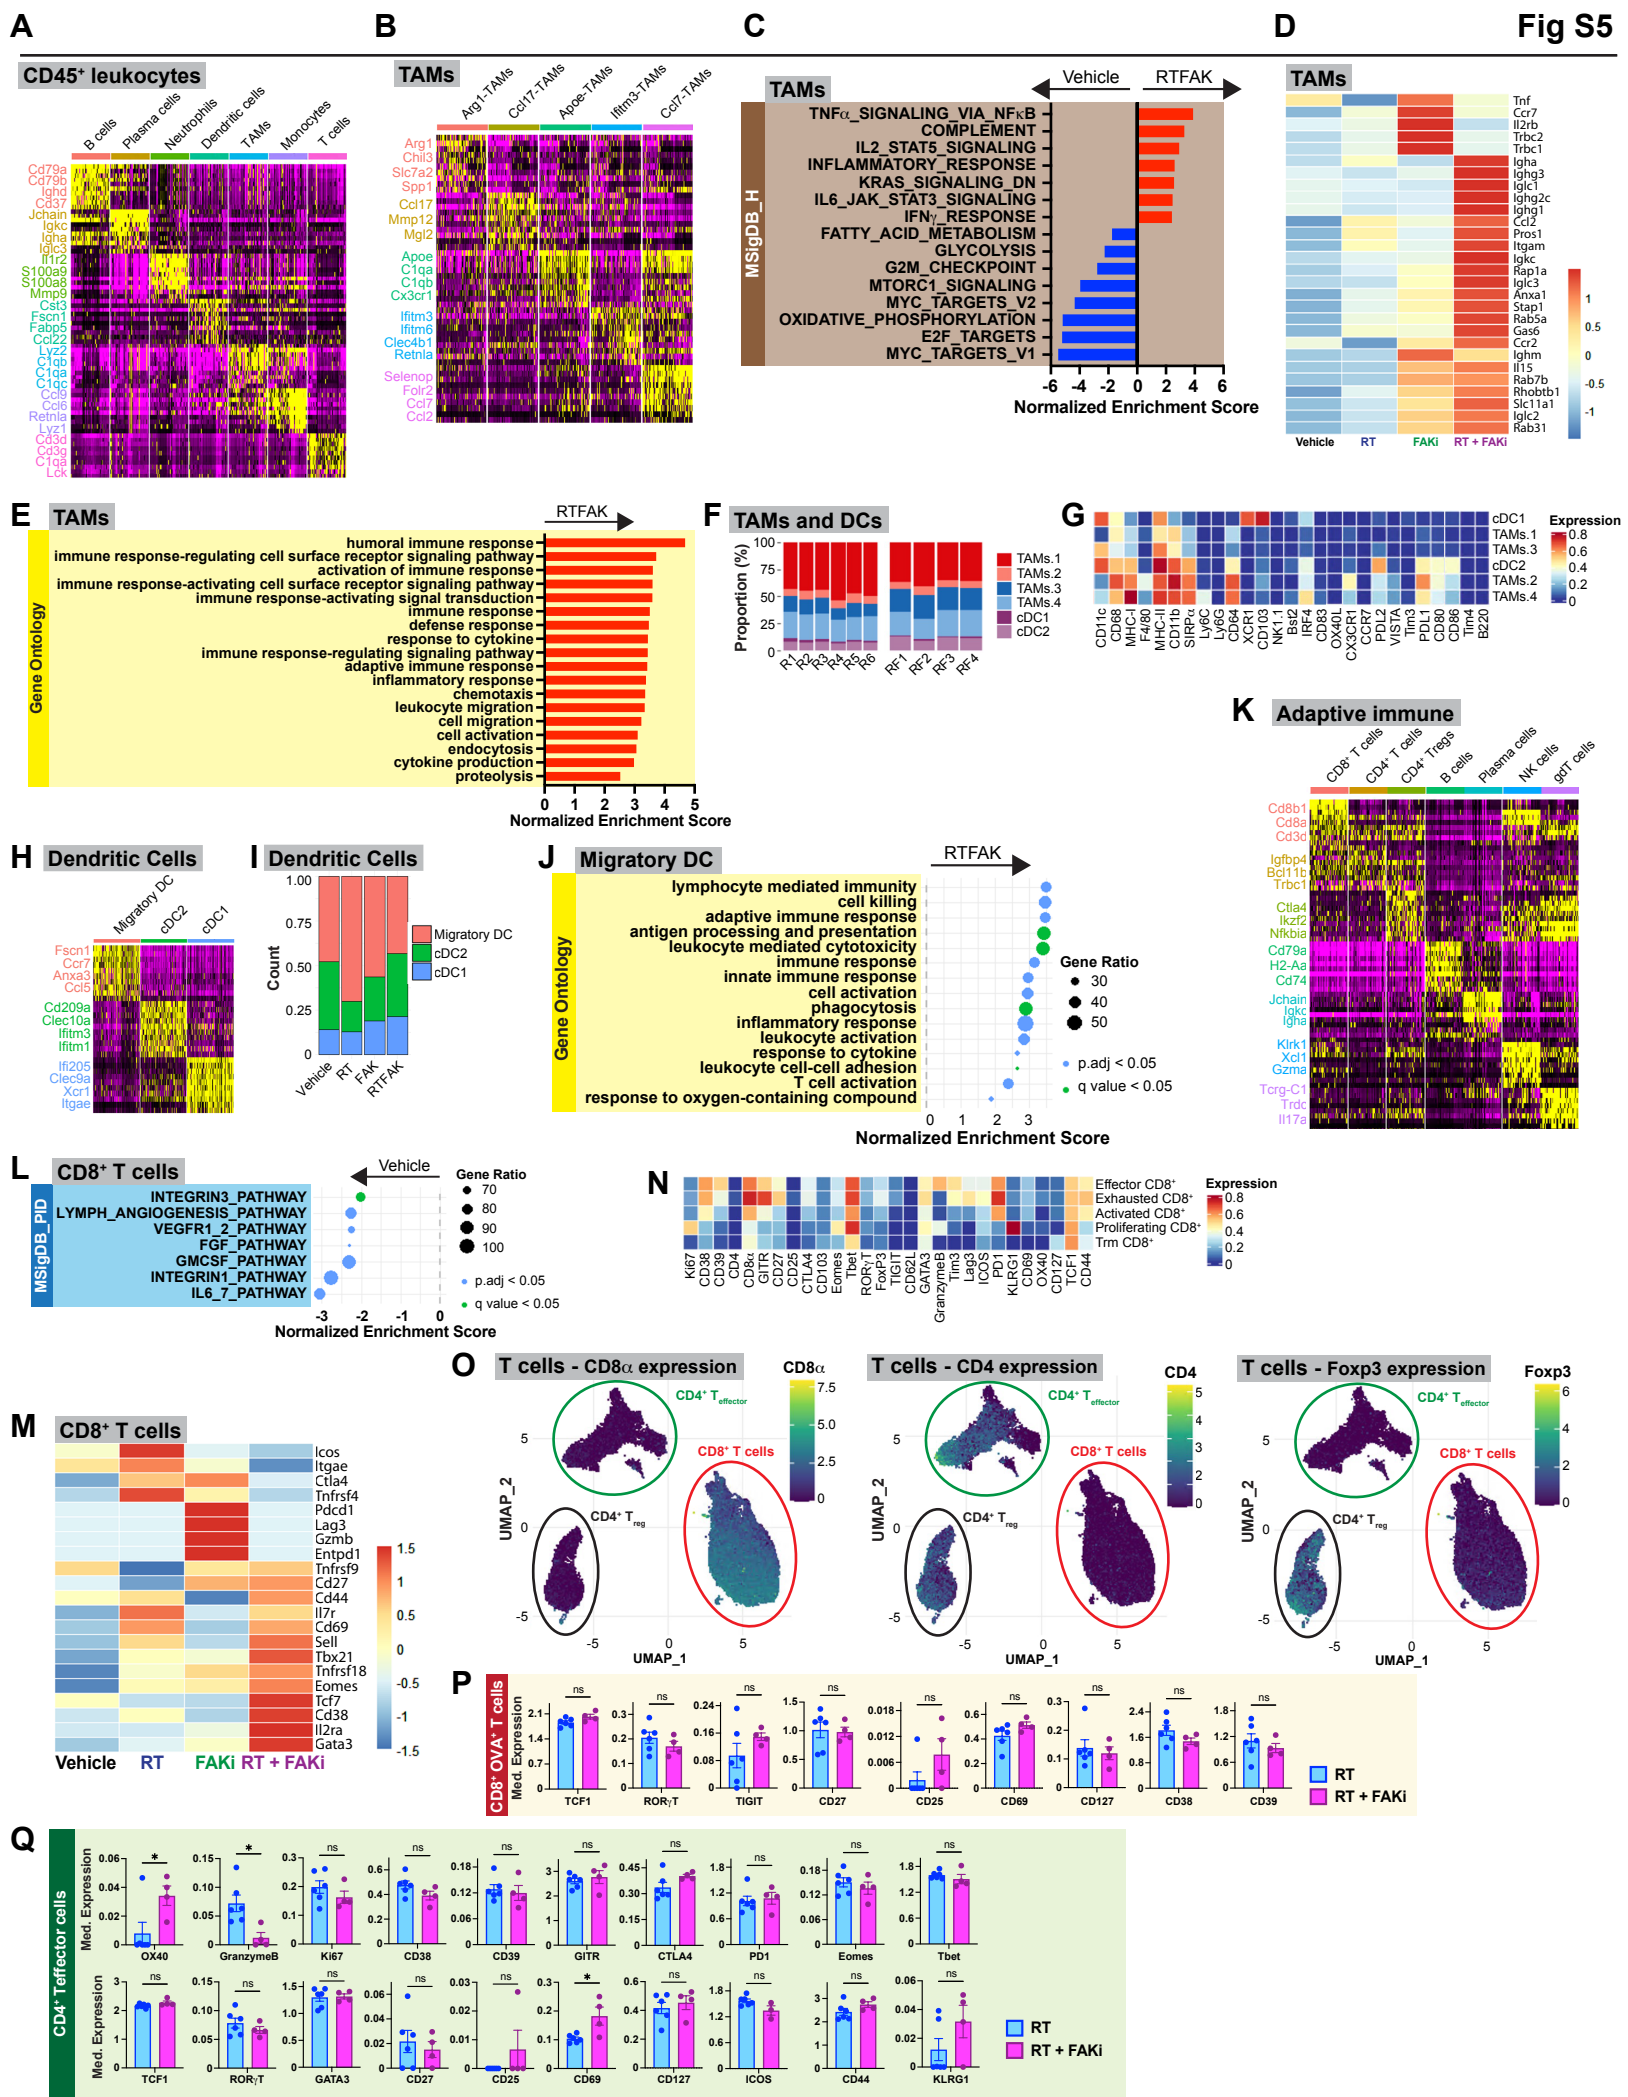

**Figure S5: Tumor-infiltrating immune cells from RT+FAKi treated mice have better anti-tumor signatures**

(A) Heatmap displaying top 10 genes of different immune cells in Fig. 5A. (B) Heatmap displaying top 10 genes of TAMs in Fig. 5B. (C) Bar graphs displaying GSEA results from MSigDB\_Hallmark database comparing TAMs in Fig. 5B. All graphs display comparisons of vehicle to RT+FAKi-treated mice. All pathways were filtered with p.adj value < 0.05. (D) Heatmap displaying relative expression level of genes related to antigen processing and presentation taken from MSigDB\_Hallmark database in TAMs from Fig. 5B. (E) Bar graphs displaying GSEA results from GO database comparing TAMs in Fig. 5B. All graphs display comparisons of vehicle to RT+FAKi-treated mice. All pathways were filtered with p.adj value < 0.05. (F) Count ratio from CyTOF analysis of the 4 TAM clusters and 2 cDC clusters from Fig. 5F. R1-R6 denotes RT-treated samples. RF1-RF4 denotes RT+FAKi-treated samples. (G) Heatmap displaying expression level of markers used in CyTOF analysis for cell clustering in Fig. 5F. (H) Heatmap displaying top 10 genes of different cDCs in Fig. 5H. (I) Count ratio from scRNA-seq analysis of the 3 cDC clusters from Fig. 5H. (J) Dot plot displaying GSEA results from GO database comparing migratory DCs clusters. All graphs display comparisons of vehicle to RT+FAKi-treated mice. All pathways were filtered with p.adj value < 0.05 or q value < 0.05. (K) Heatmap displaying top 10 genes of different adaptive immune cells in Fig. 5I. (L) Dot plot displaying GSEA analysis from MSigDB\_PID database taken from DEGs of CD8<sup>+</sup> T cells in Fig. 5I. All graphs display comparisons of vehicle to RT+FAKi-treated mice. All pathways were filtered with p.adj value < 0.05 or q value < 0.05. (M) Heatmap displaying relative expression level of genes related to effector/activation markers from CD8<sup>+</sup> T cells in Fig. 5I. (N) Heatmap displaying expression level of markers used in CyTOF analysis for cell clustering in Fig. 5O. (O) CD8, CD4, and Foxp3 expression levels projected onto UMAP plots in Fig. 5N. (P-Q) Analysis of median expression level of various markers on CD8<sup>+</sup> OVA-Dextramer<sup>+</sup> T cells (P) and CD4<sup>+</sup> T effector cells (Q) in Fig. 5N. n = at least 4 groups of pooled mice/group. All graphs depict mean +/- SEM. "\*" denotes p < 0.05 by two-tailed t-test or one-way ANOVA as appropriate. "ns" denotes not significant.
