# Supplementary material
Source: PubMed Central journal article supplement (PMC9722639)
Supplement: NIHMS1840530-supplement-8.pdf [file NIHMS1840530-supplement-8.pdf]

## A Clinical Trial

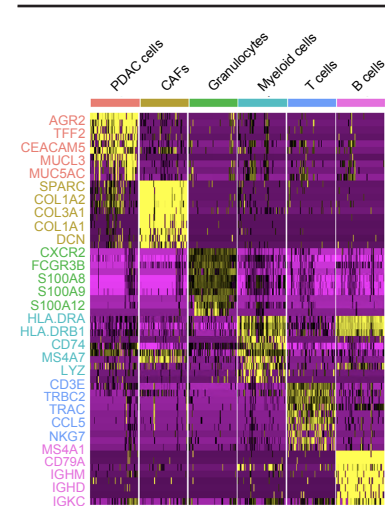

## B

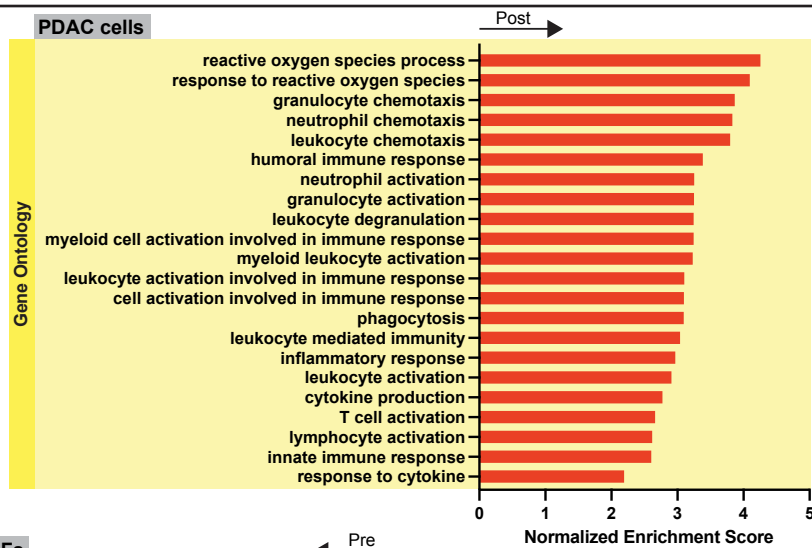

## C

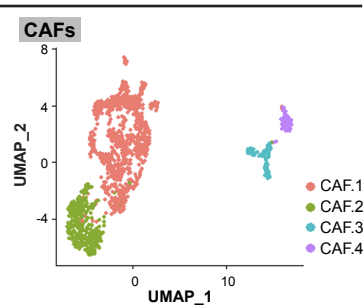

## D

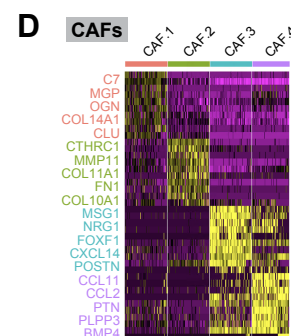

## E

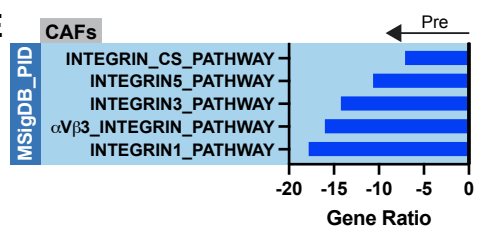

## F

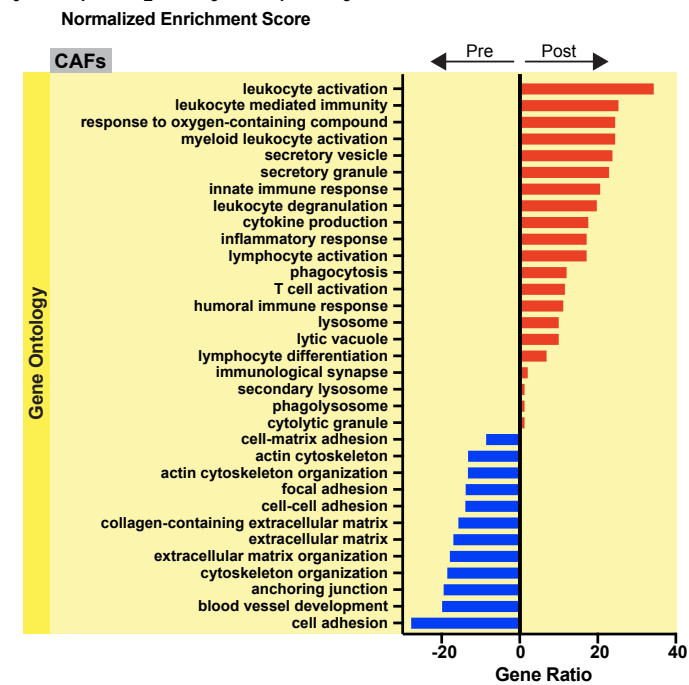

## G

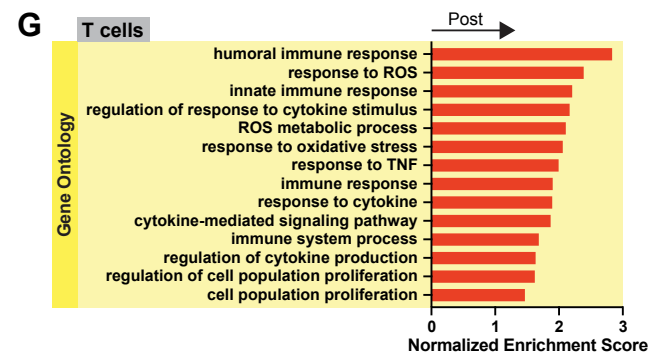

## H

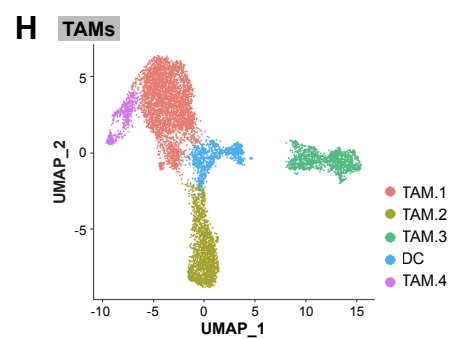

## I

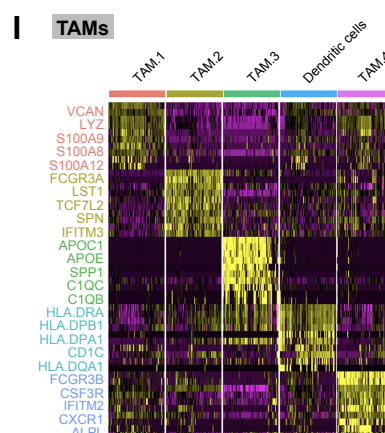

## J KP2 OVA GFP

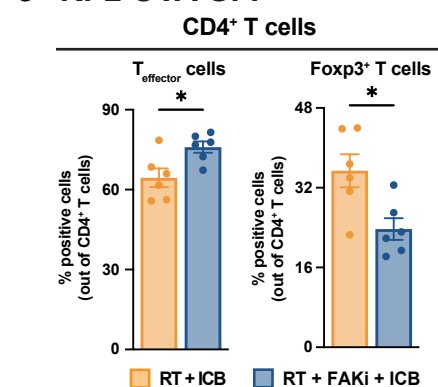

## K KRAS-INK

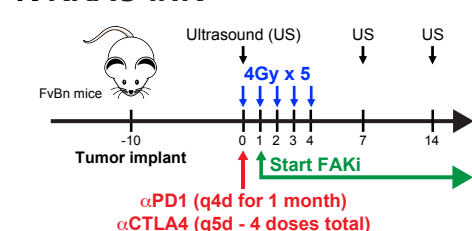

## L

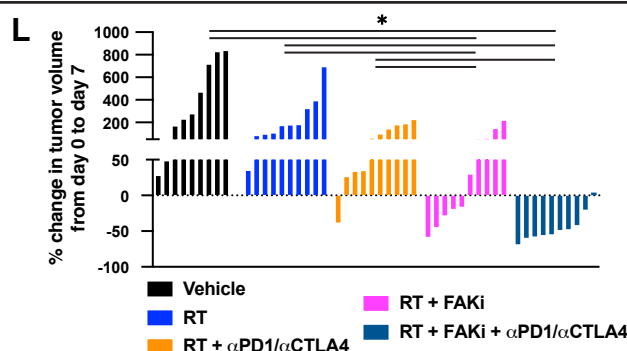

### Figure S7: Human PDAC patients and checkpoint blockade

(A) Heatmap displaying top 10 genes of different cell clusters in Fig. 7B. (B) Bar graph displaying GSEA analysis of DEGs on all the PDAC cells in Fig. 7B to known biological functions in GO database. All graphs display comparisons of pre-treatment to post-treatment biopsies. All pathways were filtered with p.adj value < 0.05. (C) UMAP analysis of CAFs isolated from Fig. 7B. (D) Heatmap displaying top 10 genes of different cell clusters in (C). (E-F) Bar graphs displaying over-representation analysis of DEGs on all the CAFs in Fig. 7B to known biological functions in MSigDB\_PID (E) and GO (F) databases. All graphs display comparisons of pre-treatment to post-treatment biopsies. All pathways were filtered with p.adj value < 0.05. (G) Bar graph displaying over-representation analysis of DEGs on all the T cells in Fig. 7B to known biological functions in GO database. All graphs display comparisons of pre-treatment to post-treatment biopsies. All pathways were filtered with p.adj value < 0.05. (H) UMAP analysis of TAMs isolated from Fig. 7B. (I) Heatmap displaying top 10 genes of different cell clusters in (H). (J) Flow cytometry quantification of CD4<sup>+</sup> T effector and CD4<sup>+</sup> Foxp3<sup>+</sup> T regulatory cells from KP2-OVA-GFP tumor bearing mice at day 10 post the start of RT. (K) Schematic of RT (4Gy x 5), FAKi (75mg/kg BID), and ICB ( $\alpha$ PD1, 200 $\mu$ g and  $\alpha$ CTLA4, 200 $\mu$ g) administration and tumor burden monitoring in KRAS-INK orthotopic tumor-bearing mice. Mice were treated and longitudinally assessed for tumor burden by US. (L) Waterfall plot of KRAS-INK tumor-bearing mice from (K) evaluating tumor growth difference from day 0 to 7 by US measurement. n = 10 mice/group.

All graphs depict mean +/- SEM. "\*" denotes p < 0.05 by one-way ANOVA or two-tailed t-test as appropriate.
